# Supplementary material for: Regional Variation of CH4 and N2 Production Processes in the Deep Aquifers of an Accretionary Prism
Source: PubMed Central journal article supplement (PMC5017811; doi:10.1264/jsme2.me16091), 2016-09-03
Supplement: 31_329_s1.pdf [file 31_329_s1.pdf]

**Table S1.** Location and structure of wells for sampling and estimated geothermal gradient.

| Site name                | Site code | Latitude      | Longitude      | Altitude<br>(m) | Well depth<br>(m) | Strainer depth<br>(m) | Water pumping method | Geothermal gradient<br>(°C km <sup>-1</sup> ) |
|--------------------------|-----------|---------------|----------------|-----------------|-------------------|-----------------------|----------------------|-----------------------------------------------|
| Takakusa No.1            | TAK-1     | 34°52'32.31"N | 138°19'25.30"E | 2               | 1,500             | 1,000-1,500           | GLS                  | 33                                            |
| Houraiso                 | HRS       | 34°52'12.42"N | 138°19'17.60"E | 2               | 150               | 150                   | NWP                  | 272                                           |
| Kawane                   | KAW       | 34°57'35.33"N | 138°05'22.61"E | 153             | 1,148             | 1,048-1,148           | NWP                  | 42                                            |
| Yaizu No. 50             | YZ-50     | 34°52'28.12"N | 138°19'17.86"E | 2               | 170               | 129-170               | WP                   | 241                                           |
| Ensyu Yawaragi           | YWR       | 34°43'44.54"N | 137°55'29.61"E | 24              | 1,500             | no data               | WP                   | 16                                            |
| Narakoko                 | NKK       | 34°52'30.81"N | 138°00'55.42"E | 176             | 1,500             | 1,300-1,500           | WP                   | 27                                            |
| Eisei Kakegawa           | EIS       | 34°49'06.82"N | 138°01'12.44"E | 45              | 1,000             | no data               | NWP                  | 29                                            |
| Itawari                  | SMD       | 34°52'18.50"N | 138°09'17.64"E | 148             | 1,489             | 1,189-1,481           | WP                   | 26                                            |
| Kozeto                   | KOZ       | 34°59'11.23"N | 138°17'54.18"E | 56              | 910               | 800-910               | NWP                  | 33                                            |
| Nishigaya                | NGY       | 35°00'53.76"N | 138°20'57.55"E | 54              | 1,500             | 1,191-1,480           | WP                   | 18                                            |
| Umegashima Shinden No. 2 | US-2      | 35°16'58.10"N | 138°20'19.66"E | 727             | 1,000             | 700-1,000             | WP                   | 33                                            |
| Aratama                  | ART       | 34°50'37.72"N | 137°45'58.38"E | 112             | 1,500             | 777-1,500             | WP                   | 23                                            |
| Iwata Grand Hotel        | IGH       | 34°44'09.26"N | 137°52'47.08"E | 43              | 1,500             | 1,400-1,500           | WP                   | 21                                            |

Abbreviation: GLS, gas lift system; NWP, natural water pressure; WP, water pump.

Geothermal gradient was simply estimated based on well depth and temperature of groundwater measured at the outflow of the wells.

**Table S2.** The chemical characteristics of groundwater samples.

| Site code | Na <sup>+</sup><br>(mg L <sup>-1</sup> ) | Ca <sup>2+</sup><br>(mg L <sup>-1</sup> ) | Mg <sup>+</sup><br>(mg L <sup>-1</sup> ) | K <sup>+</sup><br>(mg L <sup>-1</sup> ) | Fe <sup>2+</sup><br>(mg L <sup>-1</sup> ) | Fe <sup>3+</sup><br>(mg L <sup>-1</sup> ) | Cl <sup>-</sup><br>(mg L <sup>-1</sup> ) | Br <sup>-</sup><br>(mg L <sup>-1</sup> ) | I <sup>-</sup><br>(mg L <sup>-1</sup> ) | F <sup>-</sup><br>(mg L <sup>-1</sup> ) | PO <sub>4</sub> <sup>2-</sup><br>(mg L <sup>-1</sup> ) | NO <sub>2</sub> <sup>-</sup><br>(mg L <sup>-1</sup> ) | NO <sub>3</sub> <sup>-</sup><br>(mg L <sup>-1</sup> ) | NH <sub>4</sub> <sup>+</sup><br>(mg L <sup>-1</sup> ) | SO <sub>4</sub> <sup>2-</sup><br>(mg L <sup>-1</sup> ) | S <sup>2-</sup><br>(mg L <sup>-1</sup> ) | HCO <sub>3</sub> <sup>-</sup><br>(mg L <sup>-1</sup> ) | Acetate<br>(mg L <sup>-1</sup> ) | Formate<br>(mg L <sup>-1</sup> ) | DOC<br>(mg L <sup>-1</sup> ) |
|-----------|------------------------------------------|-------------------------------------------|------------------------------------------|-----------------------------------------|-------------------------------------------|-------------------------------------------|------------------------------------------|------------------------------------------|-----------------------------------------|-----------------------------------------|--------------------------------------------------------|-------------------------------------------------------|-------------------------------------------------------|-------------------------------------------------------|--------------------------------------------------------|------------------------------------------|--------------------------------------------------------|----------------------------------|----------------------------------|------------------------------|
| TAK-1     | 3,100                                    | 2,200                                     | n.d.                                     | 25                                      | 1.6                                       | n.d.                                      | 9,500                                    | 33                                       | 6.0                                     | n.d.                                    | n.d.                                                   | n.d.                                                  | n.d.                                                  | 15                                                    | 0.1                                                    | n.d.                                     | 9.6                                                    | n.d.                             | n.d.                             | 0.4                          |
| HRS       | 2,600                                    | 2,300                                     | n.d.                                     | 20                                      | n.d.                                      | n.d.                                      | 7,400                                    | 27                                       | 5.0                                     | n.d.                                    | n.d.                                                   | n.d.                                                  | n.d.                                                  | 6.0                                                   | 0.1                                                    | n.d.                                     | 6.0                                                    | n.d.                             | n.d.                             | 0.5                          |
| KAW       | 4,000                                    | 47                                        | 10                                       | 40                                      | 0.5                                       | n.d.                                      | 6,200                                    | 13                                       | 4.0                                     | 3.9                                     | n.d.                                                   | n.d.                                                  | n.d.                                                  | 9.0                                                   | 0.2                                                    | n.d.                                     | 330                                                    | n.d.                             | n.d.                             | 0.3                          |
| YZ-50     | 2,100                                    | 2,100                                     | 3.0                                      | 17                                      | 0.1                                       | n.d.                                      | 5,100                                    | 18                                       | 5.0                                     | n.d.                                    | n.d.                                                   | n.d.                                                  | n.d.                                                  | 15                                                    | 0.1                                                    | n.d.                                     | 27                                                     | n.d.                             | n.d.                             | n.d.                         |
| YWR       | 3,100                                    | 53                                        | 36                                       | 29                                      | 1.5                                       | n.d.                                      | 4,100                                    | 21                                       | 11                                      | n.d.                                    | n.d.                                                   | n.d.                                                  | n.d.                                                  | 9.6                                                   | n.d.                                                   | n.d.                                     | 780                                                    | n.d.                             | n.d.                             | 50                           |
| NKK       | 3,000                                    | 22                                        | 7.0                                      | 27                                      | 0.1                                       | 0.3                                       | 3,800                                    | 9.0                                      | n.d.                                    | 2.4                                     | n.d.                                                   | n.d.                                                  | n.d.                                                  | 7.8                                                   | 0.1                                                    | n.d.                                     | 1,300                                                  | n.d.                             | n.d.                             | 0.5                          |
| EIS       | 960                                      | 24                                        | 2.0                                      | 4.6                                     | 0.9                                       | n.d.                                      | 1,200                                    | 3.8                                      | 2.0                                     | 12                                      | n.d.                                                   | n.d.                                                  | n.d.                                                  | 2.4                                                   | 0.3                                                    | n.d.                                     | 110                                                    | n.d.                             | n.d.                             | 0.6                          |
| SMD       | 850                                      | 7.5                                       | n.d.                                     | 7.1                                     | 0.3                                       | n.d.                                      | 1,100                                    | 0.5                                      | 3.0                                     | 6.9                                     | n.d.                                                   | n.d.                                                  | n.d.                                                  | 3.9                                                   | 0.8                                                    | n.d.                                     | 581                                                    | n.d.                             | n.d.                             | 0.8                          |
| KOZ       | 900                                      | 23                                        | 7.0                                      | 59                                      | 0.3                                       | n.d.                                      | 800                                      | 0.1                                      | 1.0                                     | 14                                      | n.d.                                                   | n.d.                                                  | n.d.                                                  | 3.7                                                   | 0.3                                                    | n.d.                                     | 1,100                                                  | n.d.                             | n.d.                             | 0.6                          |
| NGY       | 760                                      | 1.6                                       | n.d.                                     | 8.1                                     | 2.3                                       | n.d.                                      | 880                                      | 3.0                                      | 4.0                                     | 9.9                                     | n.d.                                                   | n.d.                                                  | 0.1                                                   | 5.0                                                   | 0.7                                                    | n.d.                                     | 400                                                    | n.d.                             | n.d.                             | 2.5                          |
| US-2      | 370                                      | 0.9                                       | n.d.                                     | 2.8                                     | n.d.                                      | n.d.                                      | 2.7                                      | n.d.                                     | 2.0                                     | 6.9                                     | n.d.                                                   | n.d.                                                  | n.d.                                                  | 2.5                                                   | 0.6                                                    | n.d.                                     | 750                                                    | n.d.                             | n.d.                             | n.d.                         |
| ART       | 230                                      | 0.6                                       | n.d.                                     | 3.0                                     | 1.4                                       | n.d.                                      | 30                                       | 0.1                                      | n.d.                                    | 12                                      | n.d.                                                   | n.d.                                                  | n.d.                                                  | 2.7                                                   | 0.6                                                    | n.d.                                     | 642                                                    | n.d.                             | n.d.                             | n.d.                         |
| IGH       | 190                                      | 5.0                                       | 2.0                                      | 3.0                                     | 1.2                                       | n.d.                                      | 130                                      | 0.4                                      | n.d.                                    | 0.9                                     | 0.6                                                    | n.d.                                                  | n.d.                                                  | 0.6                                                   | n.d.                                                   | n.d.                                     | 14                                                     | n.d.                             | n.d.                             | 14                           |

Abbreviation: DOC, dissolved organic carbon; n.d., not detected.

**Table S3.** Stable carbon isotope ratio of CH<sub>4</sub> in natural gas and dissolved inorganic carbon (ΣCO<sub>2</sub>) in groundwater.

| Site code | δ <sup>13</sup> C <sub>CH4</sub> (‰) | δ <sup>13</sup> C <sub>ΣCO2</sub> (‰) | α <sub>c</sub> |
|-----------|--------------------------------------|---------------------------------------|----------------|
| TAK-1     | -34.6                                | -8.76                                 | 1.027          |
| HRS       | -33.5                                | -9.76                                 | 1.025          |
| KAW       | -37.0                                | -3.27                                 | 1.035          |
| YZ-50     | -34.5                                | 10.0                                  | 1.046          |
| YWR       | -69.4                                | 1.53                                  | 1.076          |
| NKK       | -42.1                                | 7.96                                  | 1.052          |
| EIS       | -48.4                                | 18.4                                  | 1.070          |
| SMD       | -39.2                                | 19.0                                  | 1.061          |
| KOZ       | -38.4                                | 10.1                                  | 1.050          |
| NGY       | -39.3                                | 13.3                                  | 1.055          |
| US-2      | -57.5                                | -1.26                                 | 1.060          |
| ART       | -52.2                                | -5.65                                 | 1.049          |
| IGH       | -65.4                                | -9.10                                 | 1.060          |

Abbreviation: α<sub>c</sub> = (δ<sup>13</sup>C<sub>ΣCO2</sub> + 10<sup>3</sup>)/(δ<sup>13</sup>C<sub>CH4</sub> + 10<sup>3</sup>).

**Table S4.** Abundance of archaeal and bacterial cells in groundwater samples detected by CARD-FISH analysis.

| Site code | Archaeal cells (%) | Bacterial cells (%) | Bacteria/Archaea ratio |
|-----------|--------------------|---------------------|------------------------|
| KAW       | 11.1               | 13.3                | 1.2                    |
| YZ-50     | 68.0               | 7.1                 | 0.1                    |
| NKK       | 5.5                | 7.1                 | 1.3                    |
| EIS       | 14.1               | 32.2                | 2.3                    |
| SMD       | 7.0                | 7.9                 | 1.1                    |
| KOZ       | 12.2               | 8.7                 | 0.7                    |
| US-2      | 8.0                | 45.2                | 5.7                    |
| ART       | 12.0               | 12.6                | 1.1                    |

The abundance of archaeal and bacterial cells were determined by the count ratio of FISH-positive cells to the SYBR Green I stained cells.

**Table S5.** Number of prokaryotic 16S rRNA gene sequences derived from groundwater and statistical estimators.

| Site code | Total of sequences | No. of OTUs | Coverage (%) | Chao 1 | Shannon |
|-----------|--------------------|-------------|--------------|--------|---------|
| KAW       | 33,274             | 652         | 99.0         | 1,849  | 6.25    |
| YZ-50     | 20,395             | 295         | 99.2         | 566    | 2.30    |
| NKK       | 15,138             | 414         | 99.2         | 559    | 5.06    |
| EIS       | 9,249              | 312         | 98.8         | 494    | 5.15    |
| SMD       | 8,958              | 196         | 99.3         | 289    | 4.15    |
| KOZ       | 16,257             | 459         | 99.4         | 578    | 6.14    |
| US-2      | 7,787              | 128         | 99.3         | 217    | 1.18    |
| ART       | 19,405             | 787         | 98.4         | 1,212  | 6.16    |

Abbreviations: OTU, operational taxonomic unit.

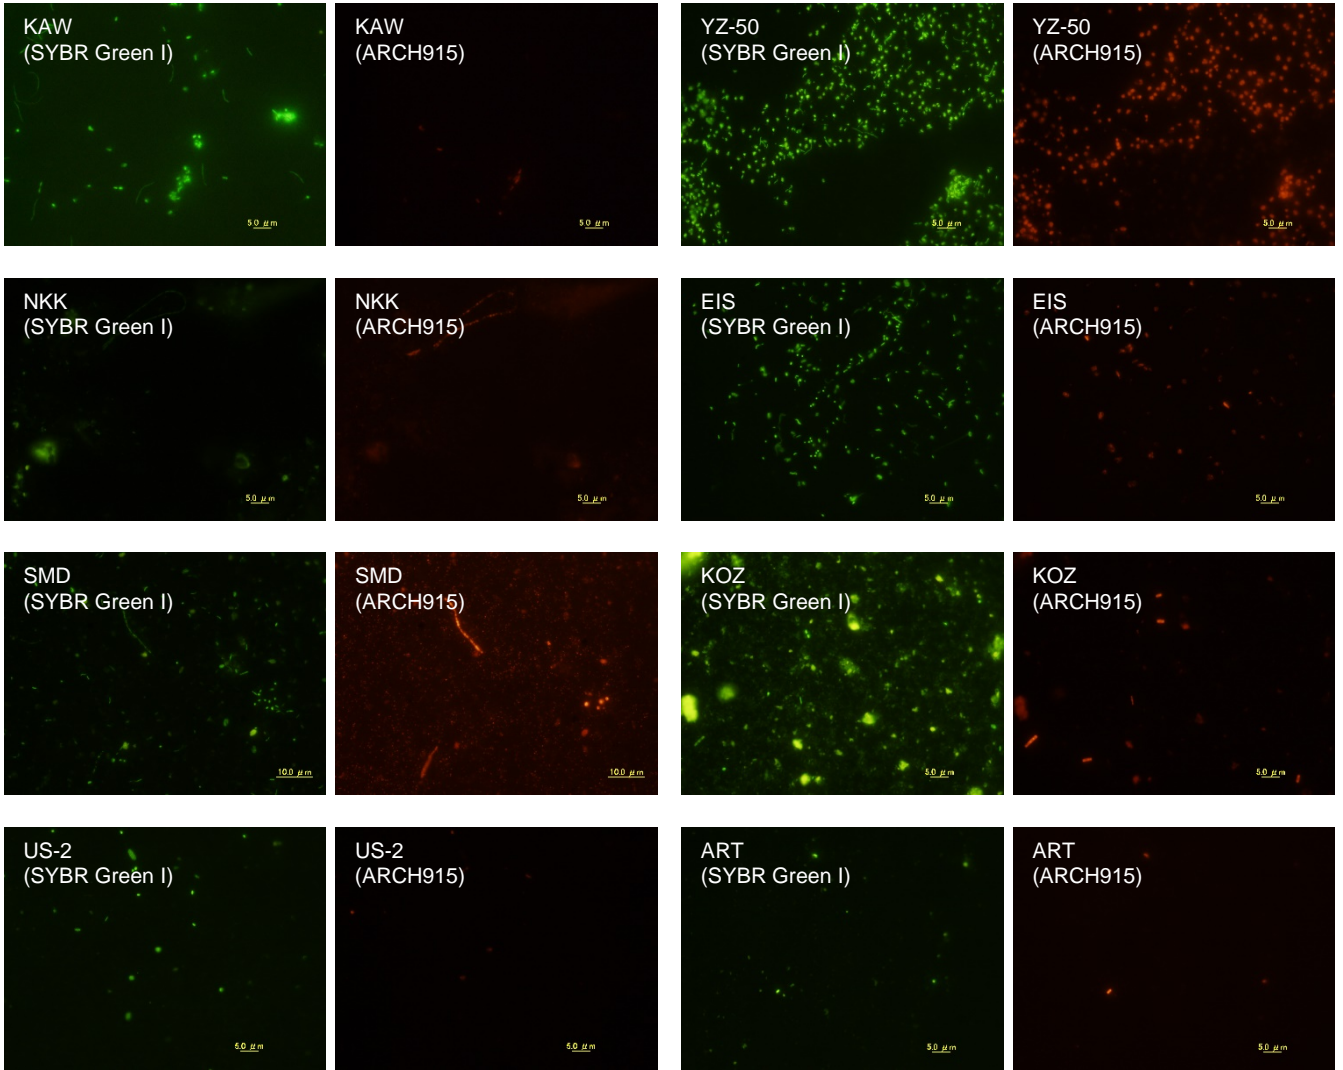

**Fig. S1** CARD-FISH photomicrographs of microbial cells in groundwater samples. Each double panel shows identical fields and depicts microbial cells counterstained with SYBR Green I in green (left) and archaeal cells hybridized with *Archaea*-specific ARCH915 probe in red (right). Yellow signals are autofluorescence of clay particles.

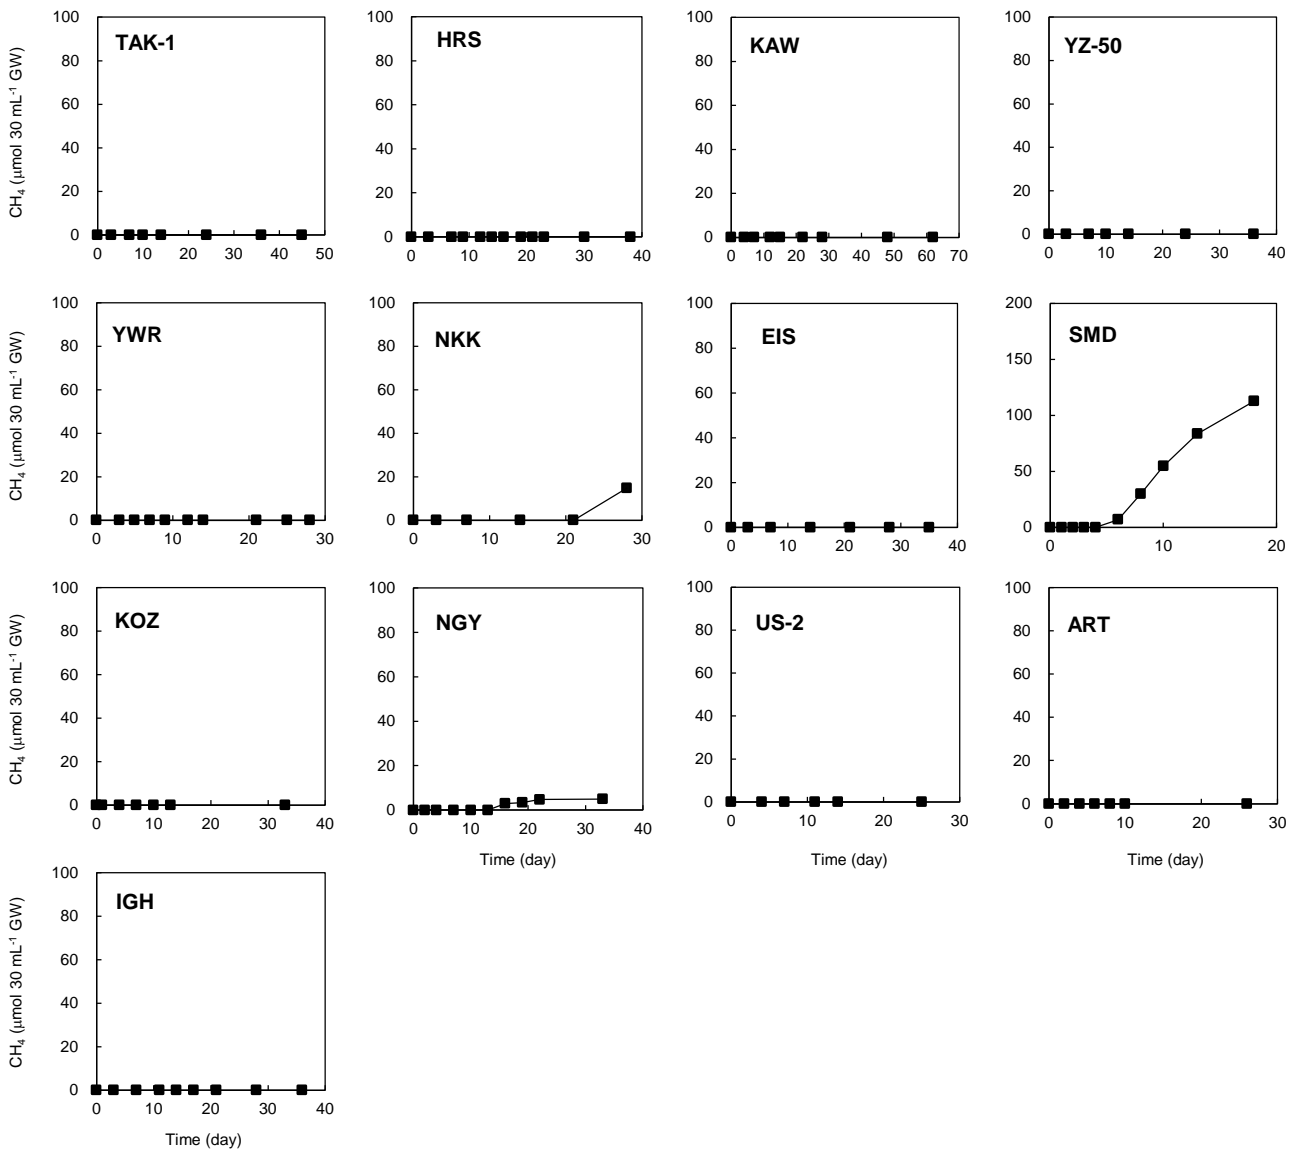

**Fig. S2.** CH<sub>4</sub> production from the groundwater samples amended with H<sub>2</sub>/CO<sub>2</sub> incubated at each temperature of groundwater sample that was measured at the outflow of the well. Date points were obtained from the measurement of cumulative CH<sub>4</sub> (■) in the gas phase of the culture bottles.

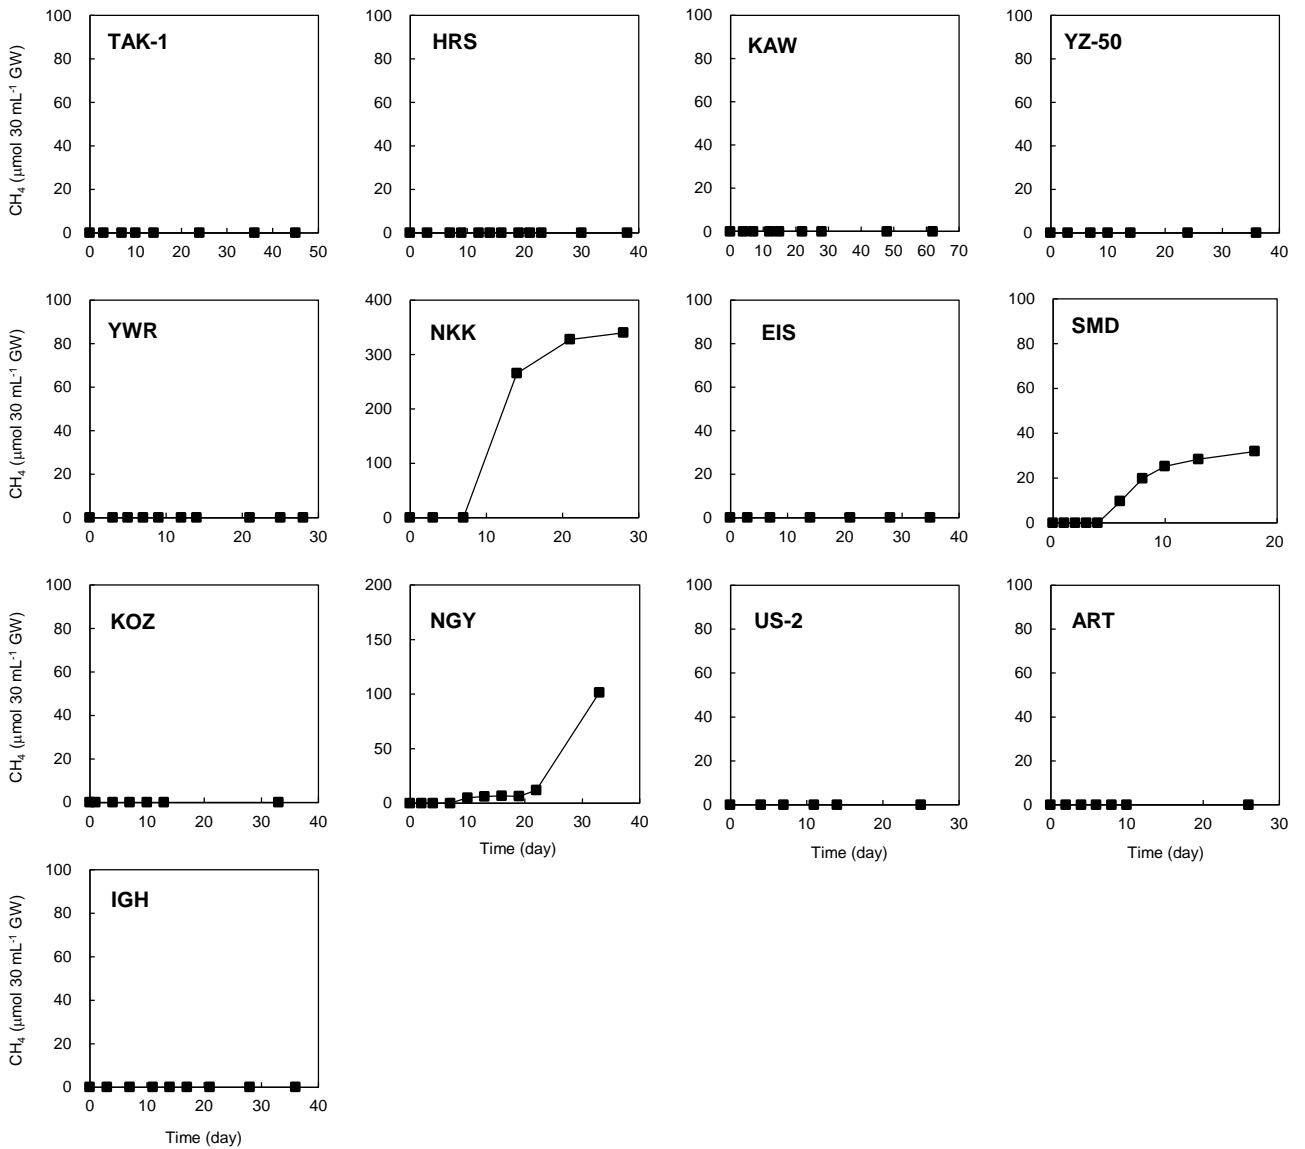

**Fig. S3.** CH<sub>4</sub> production from the groundwater samples amended with H<sub>2</sub>/CO<sub>2</sub> incubated at temperatures 10°C higher than those of groundwater samples that were measured at the outflow of the deep wells. Date points were obtained from the measurement of cumulative CH<sub>4</sub> (■) in the gas phase of the culture bottles.



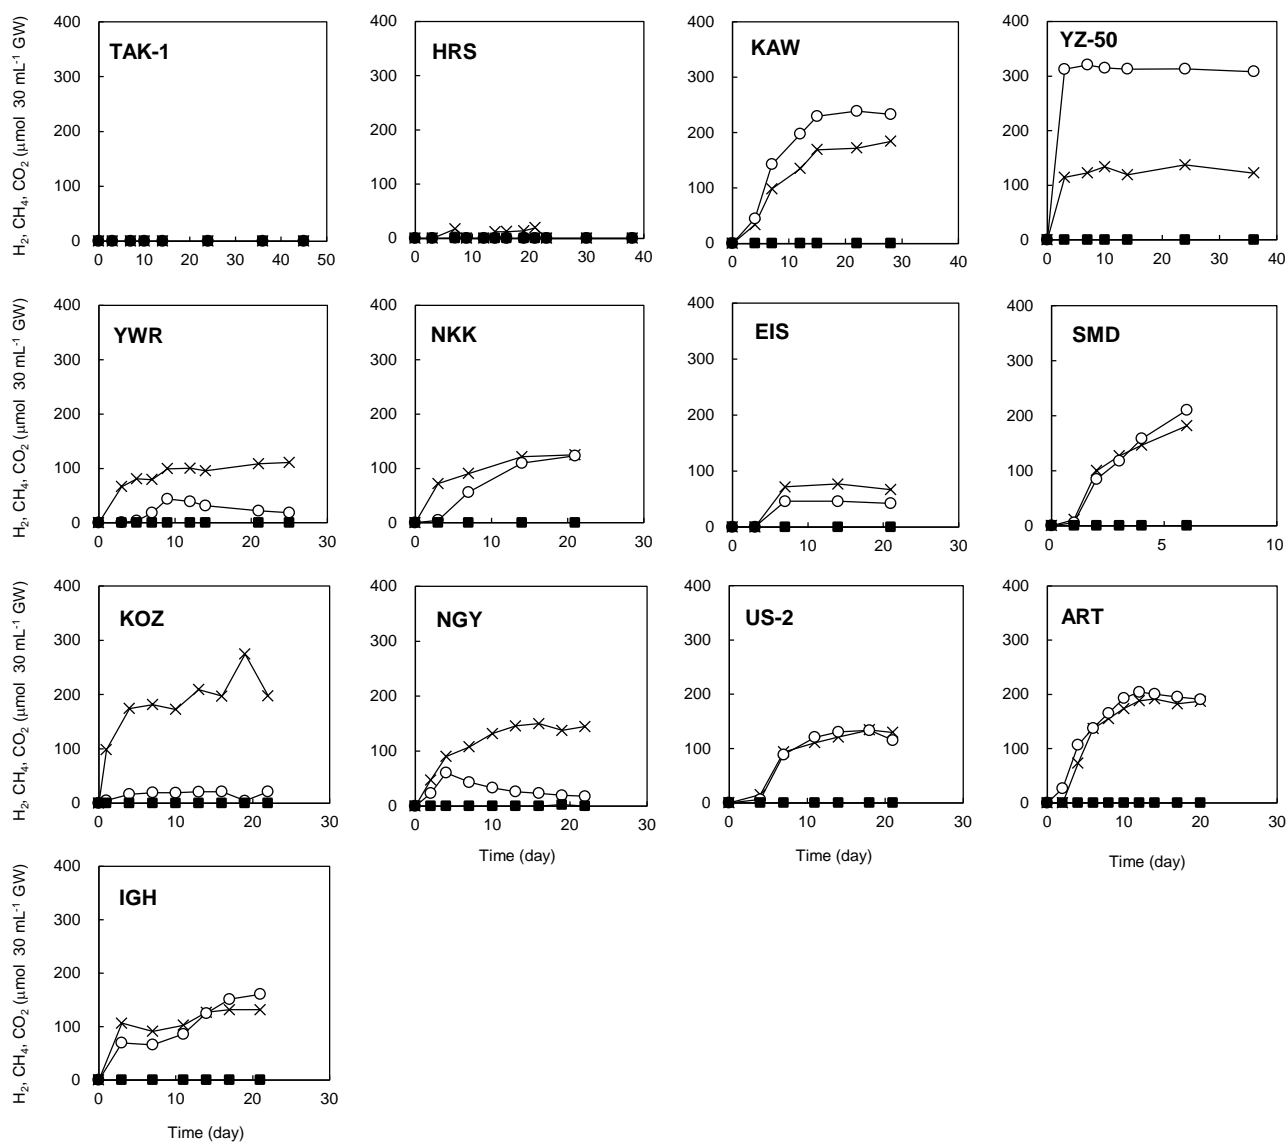

**Fig. S4.** Biogas production from the groundwater samples amended with YPG medium and 2-bromoethanesulfonate, an inhibitor of methanogens, incubated at each temperature of groundwater sample that was measured at the outflow of the deep well. Data points were obtained from the measurement of cumulative  $H_2$  (○),  $CH_4$  (■) and  $CO_2$  (×) in the gas phase of the culture bottles.

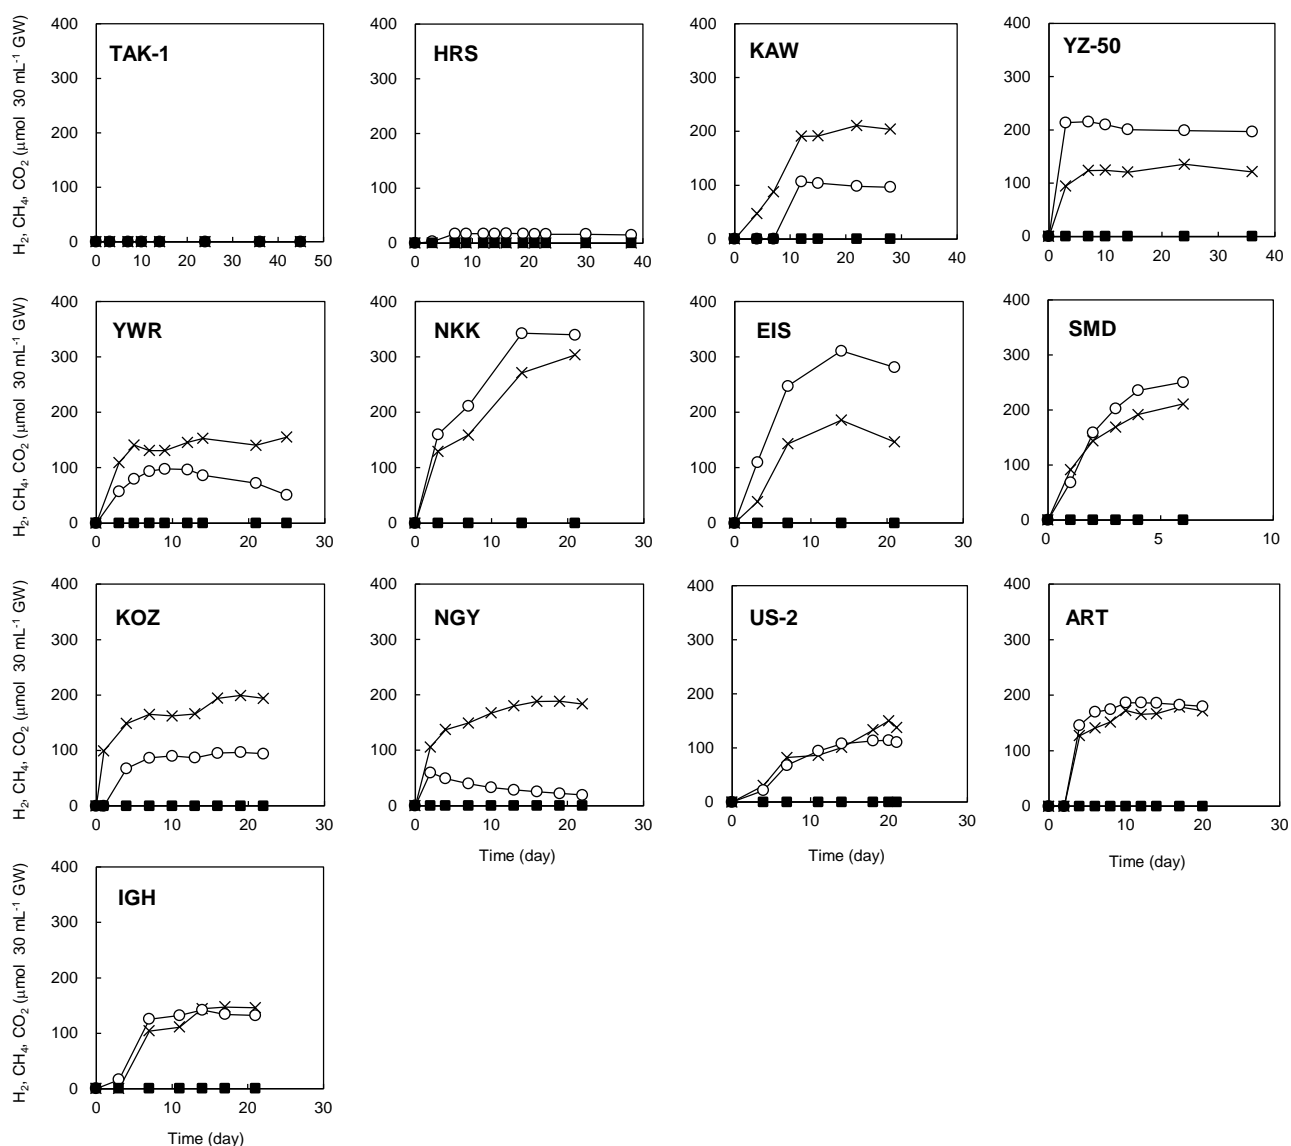

**Fig. S5.** Biogas production from the groundwater samples amended with YPG medium and 2-bromoethanesulfonate, an inhibitor of methanogens, incubated at temperatures  $10^\circ\text{C}$  higher than those of groundwater samples that were measured at the outflow of the deep wells. Data points were obtained from the measurement of cumulative  $H_2$  (○),  $CH_4$  (■) and  $CO_2$  (×) in the gas phase of the culture bottles.

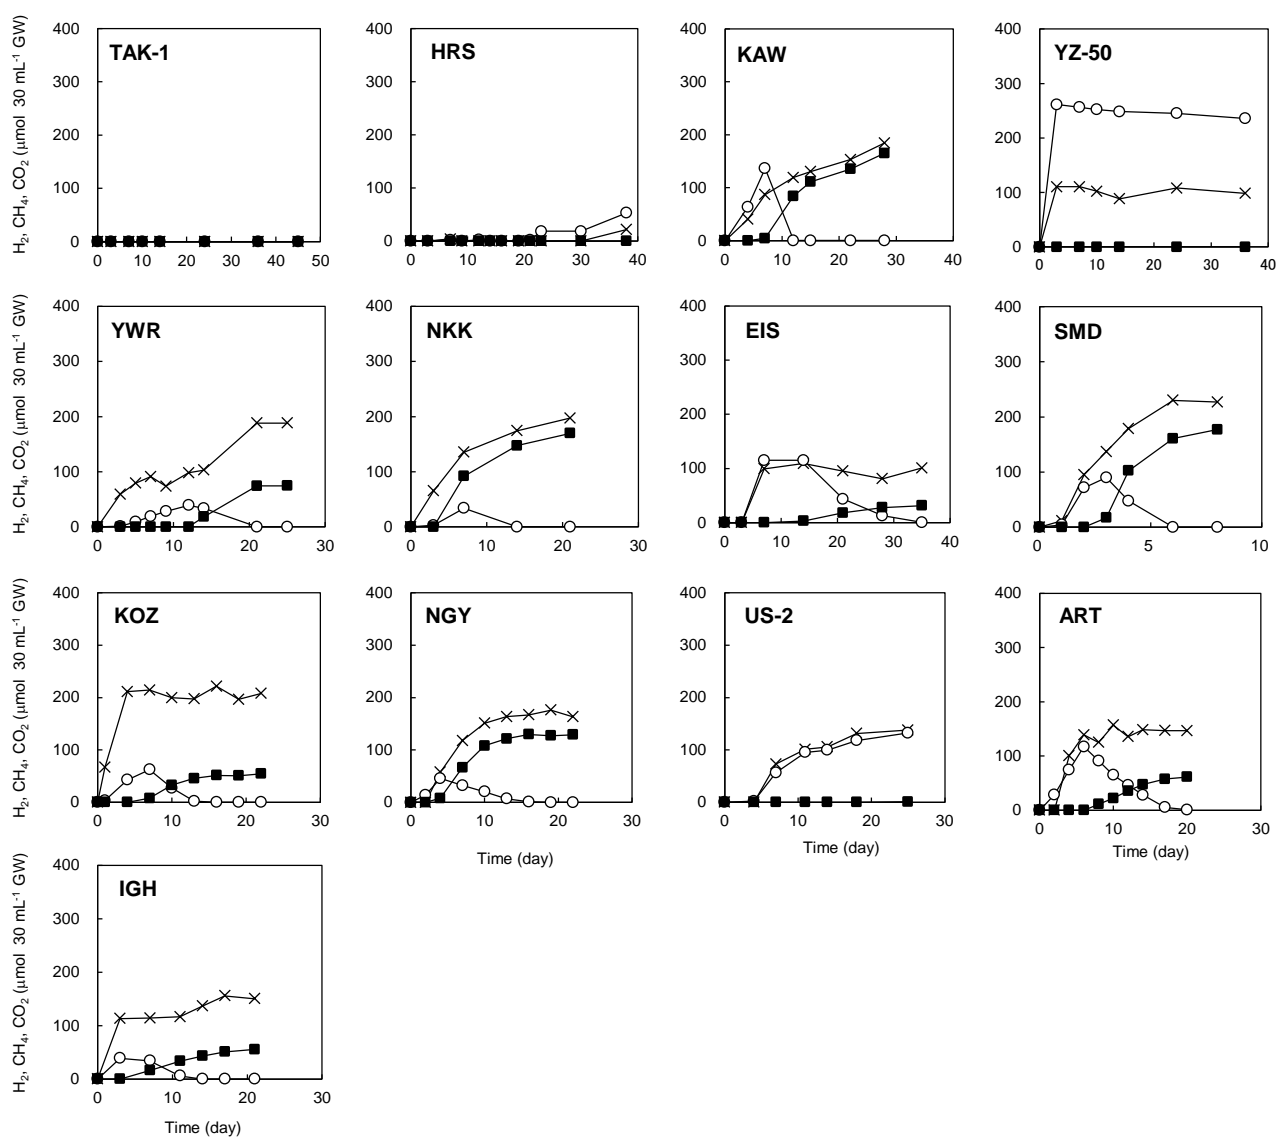

**Fig. S6.** Biogas production from the groundwater samples amended with YPG medium incubated at each temperature of groundwater sample that was measured at the outflow of the deep well. Data points were obtained from the measurement of cumulative  $H_2$  (○),  $CH_4$  (■) and  $CO_2$  (×) in the gas phase of the culture bottles.

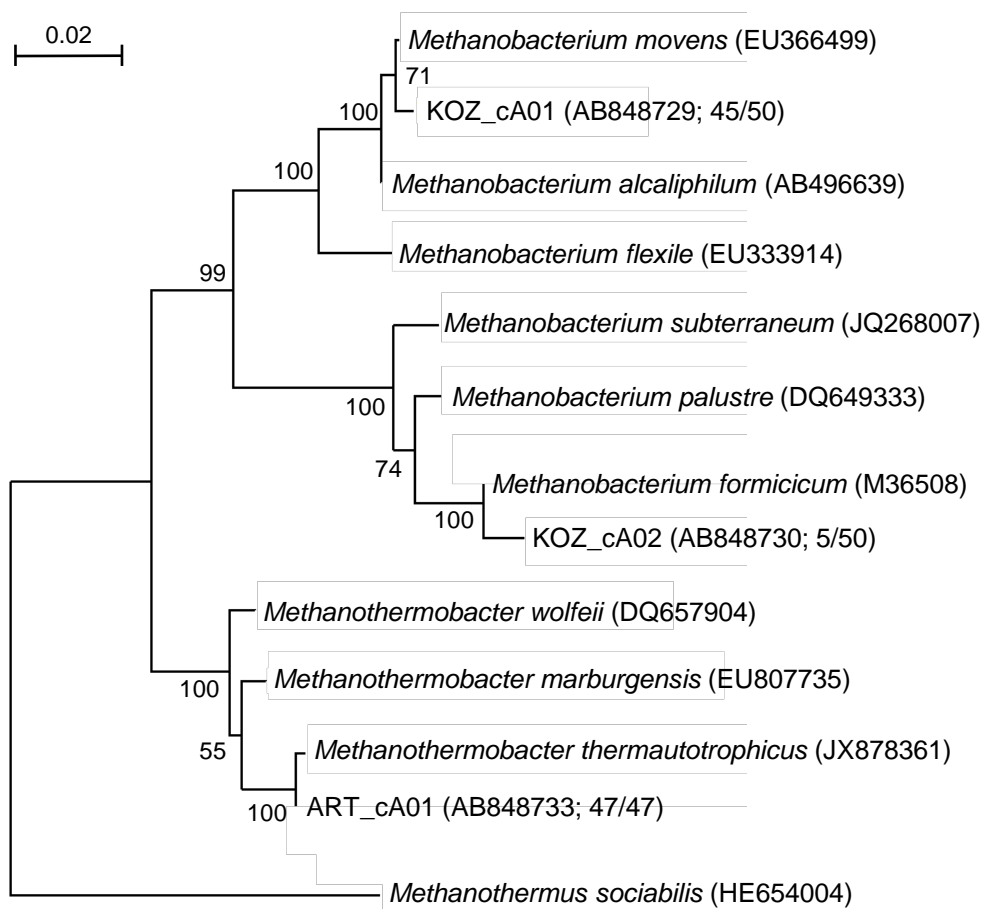

**Fig. S7.** Neighbor-joining tree of the archaeal 16S rRNA gene sequences derived from the enrichments using YPG medium-amended groundwater for CH<sub>4</sub> production. Three OTUs obtained in this study are shown with their relatives of established species whose sequences were retrieved from the public database. Accession numbers and the number of clones in each clone library are shown in parentheses. Bootstrap values determined from 1,000 iterations are indicated at branching points. The sequence of *Methanothermus sociabilis* (HE654004) was used as the outgroup to root the tree. Scale bar represents 2 substitution per 100 nucleotides.

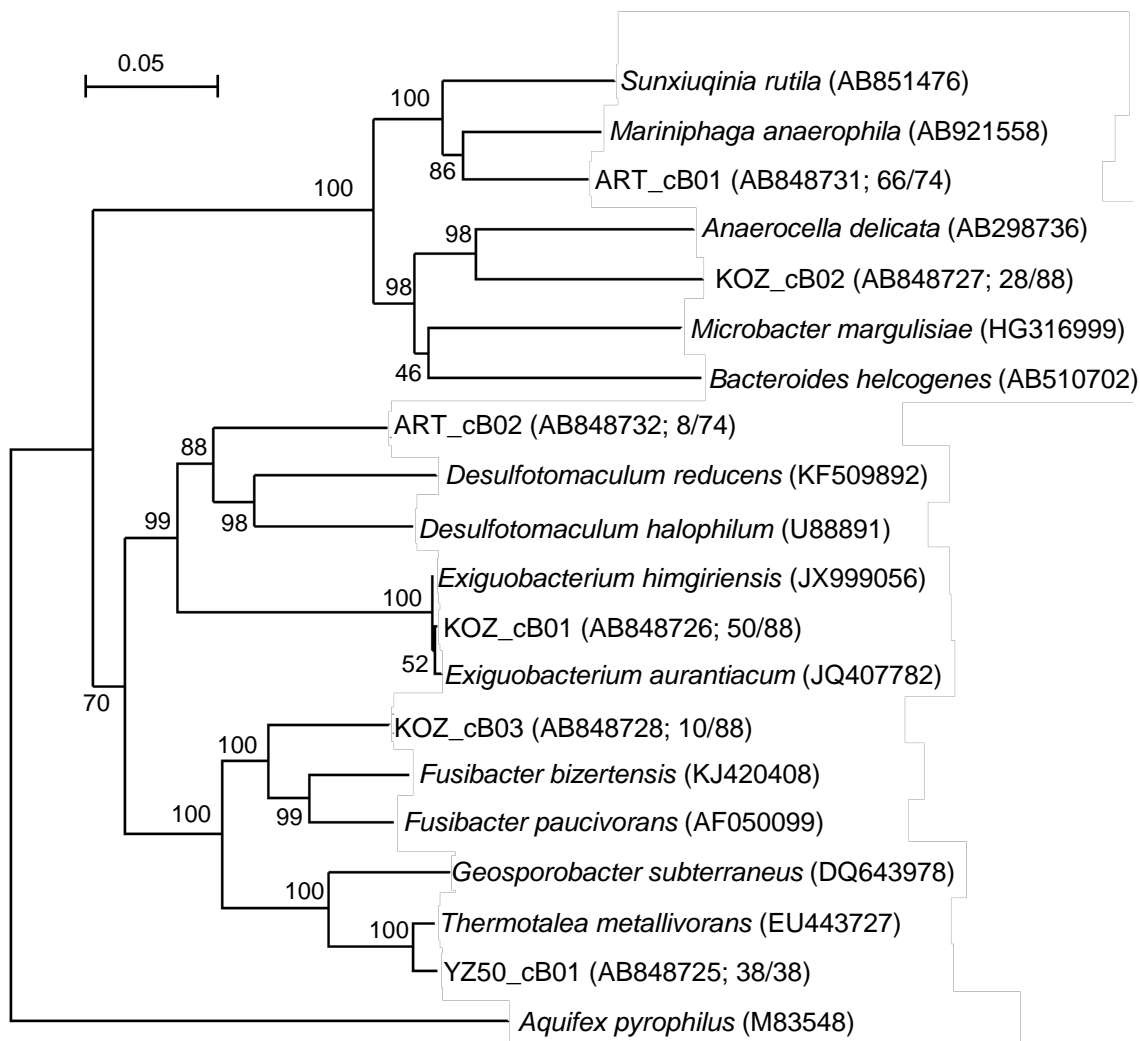

**Fig. S8.** Neighbor-joining tree of the bacterial 16S rRNA gene sequences derived from the enrichments using YPG medium-amended groundwater for CH<sub>4</sub> production. 6 OTUs obtained in this study are shown with their relatives of established species whose sequences were retrieved from the public database. Accession numbers and the number of clones in each clone library are shown in parentheses. Bootstrap values determined from 1,000 iterations are indicated at branching points. The sequence of *Aquifex pyrophilus* (MB83548) was used as the outgroup to root the tree. Scale bar represents 5 substitution per 100 nucleotides.

## US-2

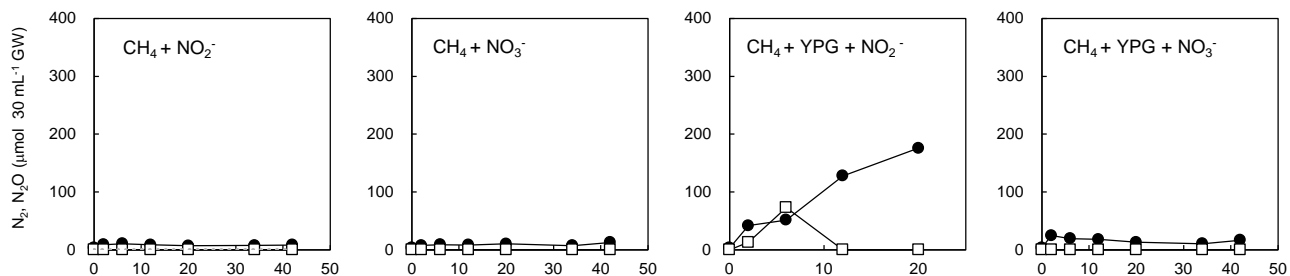

## ART

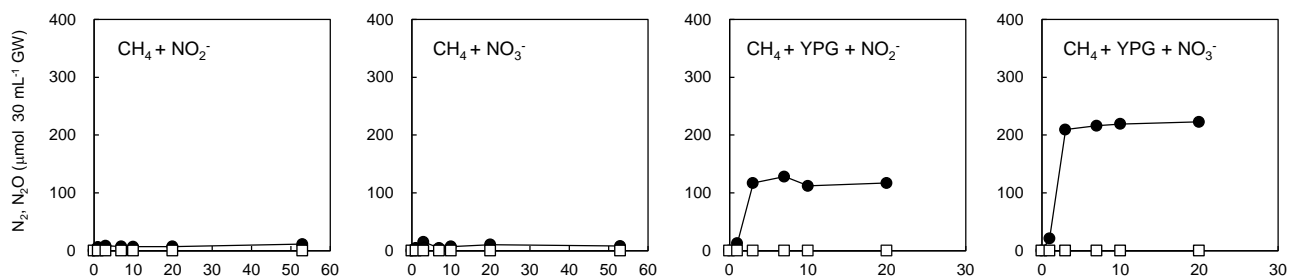

## IGH

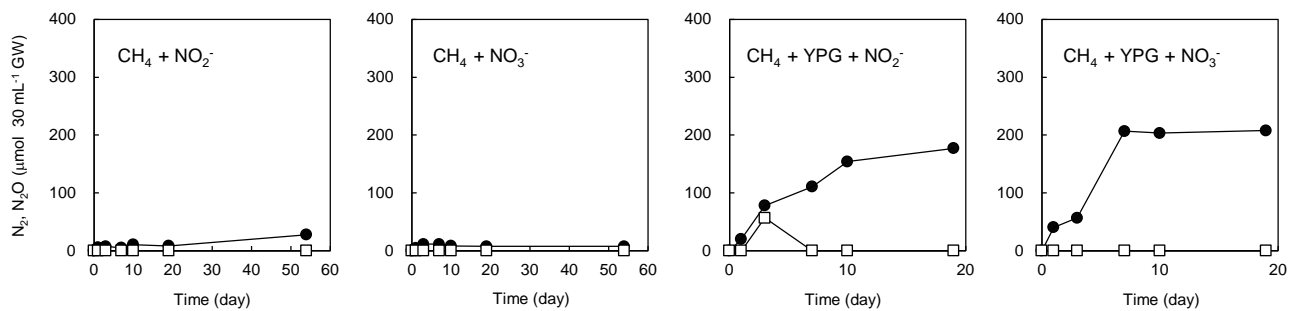

**Fig. S9.**  $N_2$  and  $N_2O$  productions from the groundwater samples amended with  $CH_4$  (and YPG medium) and nitrite (or nitrate) incubated at each temperature of groundwater sample that was measured at the outflow of the deep well. Data points were obtained from the measurement of cumulative  $N_2$  (●) and  $N_2O$  (□) in the gas phase of the culture bottles.

## US-2

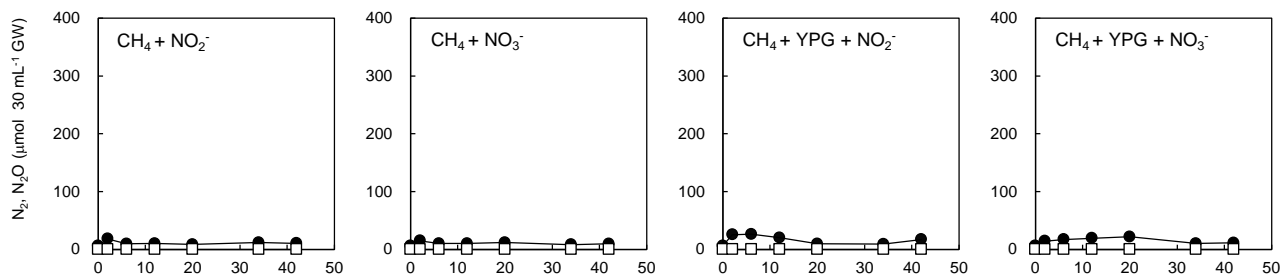

## ART

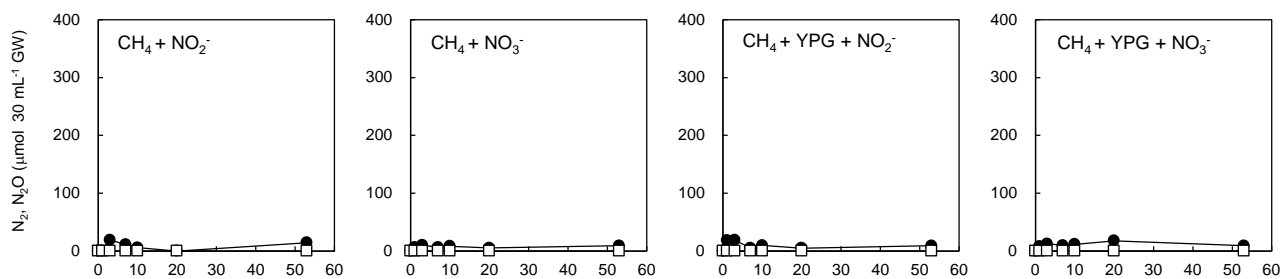

## IGH

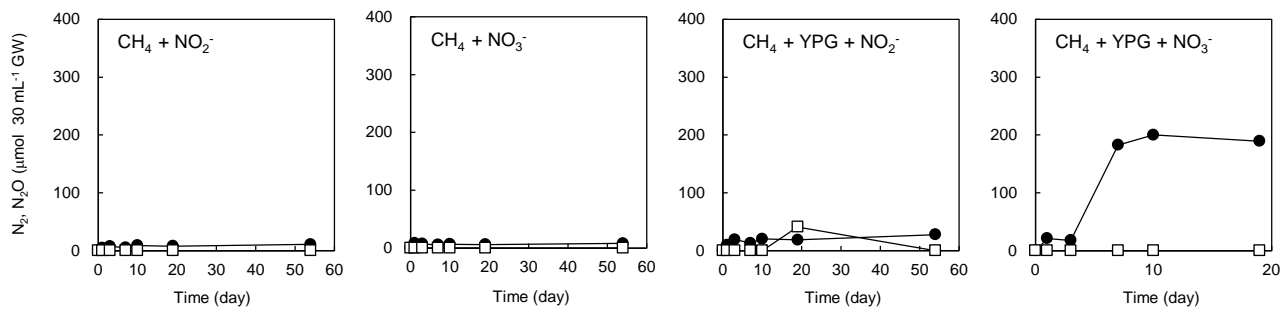

**Fig. S10.**  $N_2$  and  $N_2O$  productions from the groundwater samples amended with  $CH_4$  (and YPG medium) and nitrite (or nitrate) incubated at temperatures  $10^\circ\text{C}$  higher than those of groundwater samples that were measured at the outflow of the deep wells. Data points were obtained from the measurement of cumulative  $N_2$  (●) and  $N_2O$  (□) in the gas phase of the culture bottles.

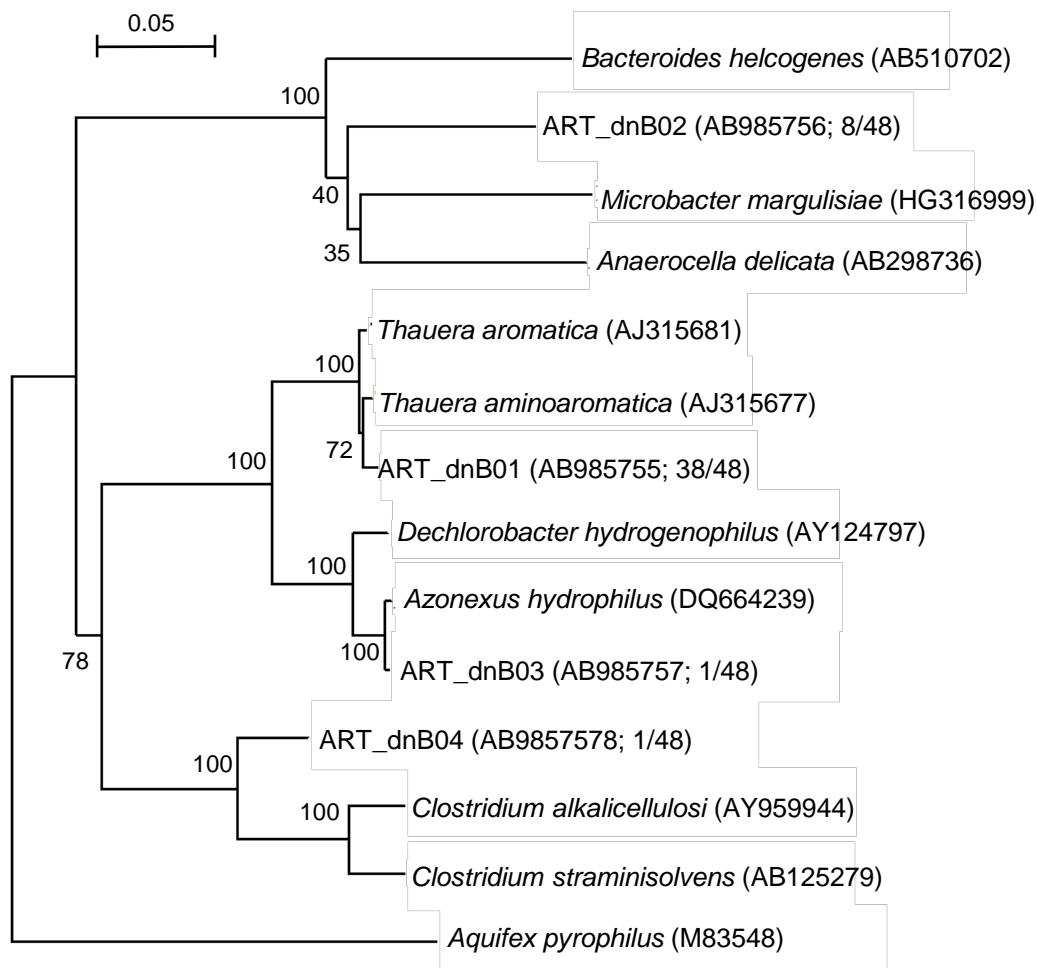

**Fig. S11.** Neighbor-joining tree of the bacterial 16S rRNA gene sequences derived from the enrichments using CH<sub>4</sub>, YPG medium, and nitrate-amended groundwater for N<sub>2</sub> production. 4 OTUs obtained in this study are shown with their relatives of established species whose sequences were retrieved from the public database. Accession numbers and the number of clones in clone library are shown in parentheses. Bootstrap values determined from 1,000 iterations are indicated at branching points. The sequence of *Aquifex pyrophilus* (MB83548) was used as the outgroup to root the tree. Scale bar represents 5 substitution per 100 nucleotides.
